# Supplementary material for: Leaks during multiple-breath washout: characterisation and influence on outcomes
Source: PubMed Central journal article supplement — ERJ Open Res. 2018 Feb 23;4(1):00012-2017. doi: 10.1183/23120541.00012-2017 (PMC5827412; doi:10.1183/23120541.00012-2017), 2018-02-23
Supplement: 00012-2017_supp.pdf [file 00012-2017_supp.pdf]

## SUPPLEMENTARY INFORMATION

### N<sub>2</sub>MBW MEASUREMENT SETUP

Flow was measured by a mainstream ultrasonic flowmeter which derives tidal volumes. Gas concentrations were measured by a sidestream oxygen (O<sub>2</sub>) sensor, main-stream carbondioxide (CO<sub>2</sub>) sensor, and the N<sub>2</sub> fraction was calculated indirectly from O<sub>2</sub>, CO<sub>2</sub> and the estimated Argon fraction. During the measurement children were breathing through a snorkel mouthpiece attached to a bacterial filter, wearing a nose clip. N<sub>2</sub>MBW measurements were stopped after three breaths below 1/40<sup>th</sup> of the N<sub>2</sub> starting concentration. FRC and LCI were calculated at 2.5% (1/40<sup>th</sup>) of normalized N<sub>2</sub> starting concentration as currently recommended [20]; the formulae are provided below.

### FORMULAE

**Formula 1:** Calculation formulae of FRC [l] and LCI according to Spiroware (Eco Medics AG, Duernten, Switzerland). Cet = expiratory N<sub>2</sub> concentration, CEV= cumulative expired volume [l], DS= dead space [l].

$$\text{FRC} = \text{CumVolN}_2 / (\text{CetStart} - \text{CetEnd})$$

$$\text{LCI} = (\text{CEV} - \text{DS}) / \text{FRC}$$

$$\text{DS} = (\text{pre-} + \text{postcap. Volume}) * \# \text{Breath}$$

$$\text{VolN}_2 \text{Netto} = \text{VolN}_2 \text{exp} - \text{VolN}_2 \text{reinsp}$$

$$\text{CumVolN}_2 = \sum \text{VolN}_2 \text{Netto}$$

**Formula 2:** Example of calculation of a pre-capillary expiratory continuous leak of 10% tidal volume, performed breath-by-breath for every tidal breath of washout.

$$\text{VolN}_2\text{exp} * 0.9 = \text{VolN}_2\text{exp leak}$$

$$\text{CEV} * 0.9 = \text{CEV leak}$$

**Formula 3:** Example of calculation of an intra-capillary side-stream continuous leak where end-tidal N<sub>2</sub> concentration [%] is overestimated by 1% N<sub>2</sub> performed breath-by-breath for every tidal breath of an extended washout. Accordingly, CumVolN<sub>2</sub> was altered, resulting in new FRC and LCI values.

$$\text{Cet} + 1 = \text{Cetleak}$$

$$\text{VolN}_2\text{exp} + 0.01 * \text{Volexp} = \text{VolN}_2\text{exp leak}$$

## TABLES

**Table S1: Modeling of pre-capillary expiratory continuous leak into the original N<sub>2</sub>MBW trace**

| Breath #                | Cet [%] | FRC [l]     | FRC leak 20% [l]    |                                         |               |                   | CEV-DS [l]    |                   |               |                   | VoIN2Exp [ml] |                   |               |                   | CumVoIN2Netto [ml] |                   |  |  |
|-------------------------|---------|-------------|---------------------|-----------------------------------------|---------------|-------------------|---------------|-------------------|---------------|-------------------|---------------|-------------------|---------------|-------------------|--------------------|-------------------|--|--|
|                         |         |             | whole washout       | after 1/2 washout                       | whole washout | after 1/2 washout | whole washout | after 1/2 washout | whole washout | after 1/2 washout | whole washout | after 1/2 washout | whole washout | after 1/2 washout | whole washout      | after 1/2 washout |  |  |
| 1                       | 59.547  | 2.768       | 2.192               | 2.768                                   | 1.139         | 0.911             | 1.093         | 0.865             | 1.093         | 545.255           | 436.204       | 415.043           | 524.094       | 415.043           | 524.094            |                   |  |  |
| 2                       | 46.473  | 2.723       | 2.155               | 2.723                                   | 1.008         | 0.807             | 2.055         | 1.626             | 2.055         | 363.431           | 290.745       | 274.795           | 871.576       | 689.839           | 871.576            |                   |  |  |
| 3                       | 36.495  | 2.841       | 2.250               | 2.841                                   | 1.144         | 0.915             | 3.154         | 2.495             | 3.154         | 332.220           | 265.776       | 254.638           | 1192.657      | 944.476           | 1192.657           |                   |  |  |
| 4                       | 29.408  | 2.986       | 2.365               | 2.986                                   | 1.199         | 0.960             | 4.307         | 3.409             | 4.307         | 283.576           | 226.861       | 216.004           | 1465.376      | 1160.480          | 1465.376           |                   |  |  |
| 5                       | 23.519  | 3.049       | 2.414               | 3.049                                   | 1.177         | 0.942             | 5.438         | 4.305             | 5.438         | 220.807           | 176.645       | 166.295           | 1675.832      | 1326.775          | 1675.832           |                   |  |  |
| 6                       | 18.847  | 3.089       | 2.446               | 3.089                                   | 1.161         | 0.929             | 6.553         | 5.188             | 6.553         | 173.944           | 139.155       | 131.528           | 1842.149      | 1458.303          | 1842.149           |                   |  |  |
| 7                       | 15.132  | 3.112       | 2.463               | 3.112                                   | 1.128         | 0.902             | 7.635         | 6.044             | 7.635         | 135.017           | 108.014       | 102.106           | 1971.259      | 1560.409          | 1971.259           |                   |  |  |
| 8                       | 12.342  | 3.128       | 2.476               | 3.128                                   | 1.059         | 0.848             | 8.648         | 6.845             | 8.648         | 102.489           | 81.991        | 77.141            | 2068.898      | 1637.550          | 2068.898           |                   |  |  |
| 9                       | 10.057  | 3.160       | 2.501               | 3.160                                   | 1.207         | 0.965             | 9.809         | 7.764             | 9.809         | 96.981            | 77.584        | 73.976            | 2162.270      | 1711.526          | 2162.270           |                   |  |  |
| 10                      | 8.190   | 3.185       | 2.521               | 3.185                                   | 1.206         | 0.965             | 10.969        | 8.683             | 10.969        | 80.312            | 64.250        | 60.622            | 2238.954      | 1772.148          | 2238.954           |                   |  |  |
| 11                      | 6.801   | 3.214       | 2.544               | 3.195                                   | 1.223         | 0.979             | 12.147        | 9.616             | 11.902        | 67.532            | 54.025        | 51.426            | 2303.887      | 1823.574          | 2290.380           |                   |  |  |
| 12                      | 5.629   | 3.244       | 2.568               | 3.209                                   | 1.337         | 1.069             | 13.437        | 10.640            | 12.925        | 61.806            | 49.445        | 47.144            | 2363.392      | 1870.718          | 2337.524           |                   |  |  |
| 13                      | 4.742   | 3.263       | 2.583               | 3.216                                   | 1.148         | 0.918             | 14.539        | 11.512            | 13.798        | 44.474            | 35.579        | 33.545            | 2405.832      | 1904.263          | 2371.069           |                   |  |  |
| 14                      | 4.043   | 3.283       | 2.599               | 3.226                                   | 1.204         | 0.963             | 15.697        | 12.429            | 14.715        | 40.020            | 32.016        | 30.076            | 2443.912      | 1934.339          | 2401.145           |                   |  |  |
| 15                      | 3.463   | 3.302       | 2.614               | 3.236                                   | 1.215         | 0.972             | 16.867        | 13.355            | 15.641        | 34.664            | 27.732        | 26.306            | 2477.151      | 1960.645          | 2427.451           |                   |  |  |
| 16                      | 2.997   | 3.322       | 2.629               | 3.248                                   | 1.258         | 1.007             | 18.079        | 14.316            | 16.602        | 31.806            | 25.445        | 23.926            | 2507.438      | 1984.571          | 2451.377           |                   |  |  |
| 17                      | 2.729   | 3.345       | 2.647               | 3.263                                   | 1.207         | 0.966             | 19.240        | 15.236            | 17.522        | 27.569            | 22.055        | 20.603            | 2533.554      | 2005.173          | 2471.980           |                   |  |  |
| 18                      | 2.458   | 3.363       | 2.661               | 3.275                                   | 1.155         | 0.924             | 20.349        | 16.114            | 18.400        | 23.872            | 19.097        | 17.977            | 2556.306      | 2023.151          | 2489.957           |                   |  |  |
| 19                      | 2.292   | 3.380       | 2.675               | 3.287                                   | 1.046         | 0.837             | 21.349        | 16.905            | 19.191        | 19.574            | 15.660        | 14.604            | 2574.825      | 2037.755          | 2504.561           |                   |  |  |
| 20                      | 2.177   | 3.401       | 2.692               | 3.303                                   | 1.186         | 0.949             | 22.489        | 17.807            | 20.093        | 21.212            | 16.970        | 15.973            | 2595.041      | 2053.728          | 2520.535           |                   |  |  |
| 21                      | 2.062   | 3.418       | 2.705               | 3.316                                   | 1.047         | 0.838             | 23.490        | 18.599            | 20.885        | 17.631            | 14.105        | 13.238            | 2611.805      | 2066.966          | 2533.773           |                   |  |  |
| 22                      | 1.946   | 3.433       | 2.717               | 3.327                                   | 1.003         | 0.802             | 24.447        | 19.355            | 21.641        | 16.224            | 12.979        | 12.078            | 2627.127      | 2079.044          | 2545.850           |                   |  |  |
| 23                      | 1.927   | 3.454       | 2.734               | 3.343                                   | 1.130         | 0.904             | 25.531        | 20.213            | 22.499        | 17.987            | 14.390        | 13.617            | 2644.342      | 2092.661          | 2559.467           |                   |  |  |
| 24                      | 1.895   | 3.474       | 2.749               | 3.359                                   | 1.110         | 0.888             | 26.595        | 21.055            | 23.341        | 17.154            | 13.723        | 12.817            | 2660.590      | 2105.478          | 2572.284           |                   |  |  |
| 25                      | 1.767   | 3.490       | 2.762               | 3.371                                   | 1.183         | 0.946             | 27.732        | 21.956            | 24.241        | 17.773            | 14.219        | 13.287            | 2677.432      | 2118.765          | 2585.571           |                   |  |  |
| 26                      | 1.735   | 3.508       | 2.776               | 3.384                                   | 1.051         | 0.841             | 28.737        | 22.750            | 25.036        | 15.359            | 12.287        | 11.521            | 2692.025      | 2130.286          | 2597.093           |                   |  |  |
|                         |         |             | <b>without leak</b> | <b>20% precapillary expiratory leak</b> |               |                   |               |                   |               |                   |               |                   |               |                   |                    |                   |  |  |
|                         |         |             | whole washout       | after 1/2 washout                       |               |                   |               |                   |               |                   |               |                   |               |                   |                    |                   |  |  |
| <b>LCI (CEV-DS/FRC)</b> |         | <b>7.12</b> | <b>7.12</b>         | <b>6.5</b>                              |               |                   |               |                   |               |                   |               |                   |               |                   |                    |                   |  |  |

Example of breath-by-breath modelling of a pre-capillary expiratory continuous leak of 20% during the whole washout and after 1/2 washout in a breath table of a quality controlled washout measurement of a healthy adolescent. Columns for lung turnover (TO = CEV/FRC), Cet Start, CEV, DS, N<sub>2</sub>InspMean, VoIN<sub>2</sub>Netto, VoIN<sub>2</sub>Reinsp are not illustrated for better overview. Calculations are based on the above named formulae online supplement. Names and abbreviations of columns are analog to Spiroware (Eco Medics AG, Duernten, Switzerland).

## FIGURES

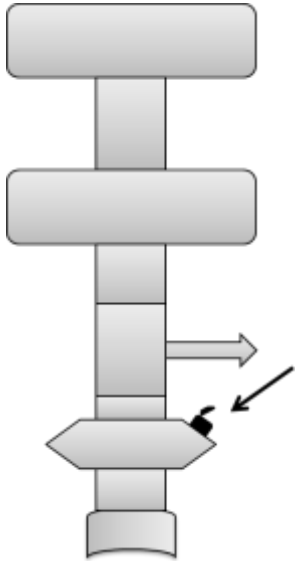

**Figure S1:** Example pre-capillary leak performed in practice with open valve of Pediatric slimline® filter. Other leaks are incorporated similarly by opening valves or lue locks on different locations in the system.

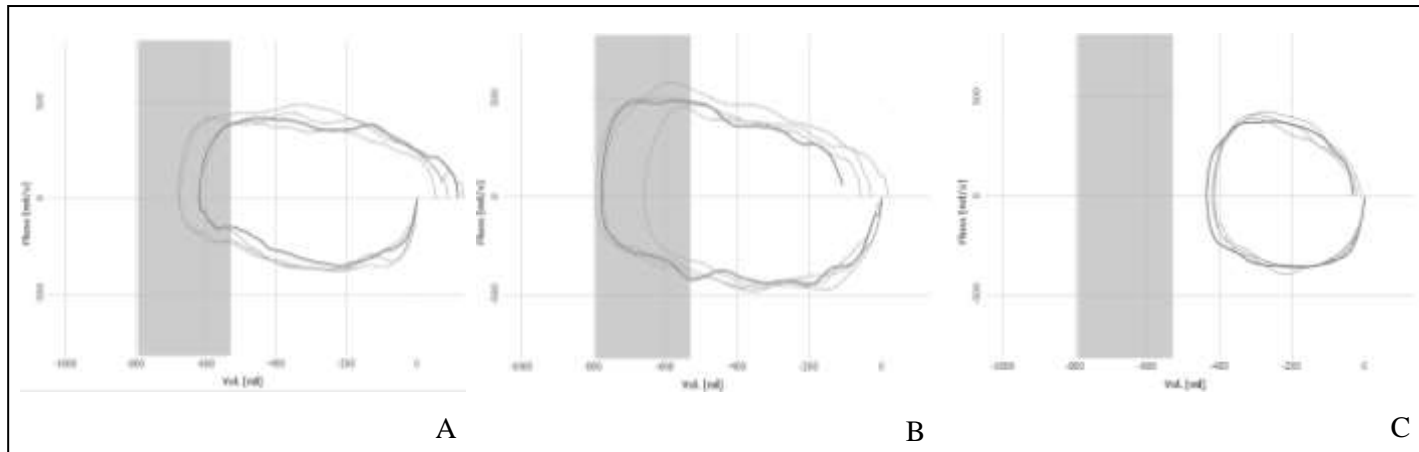

**Figure S2:** Practical examples of flow-volume loops due to leaks. The grey area denotes the measured weight based target VT (10-15ml/kg measured weight).according to the manufacturer. Figure S2A: In a pre-capillary inspiratory leak the expiratory volume appears to be larger than inspiratory volume. Figure S2B: In a pre-capillary expiratory leak the inspiratory volume appears to be larger than expiratory volume. Figure S2C: In the pre-capillary inspiratory and expiratory leak the tidal volume deviates largely from the grey “normal” area and is also underestimated as compared to S2A and S2B.

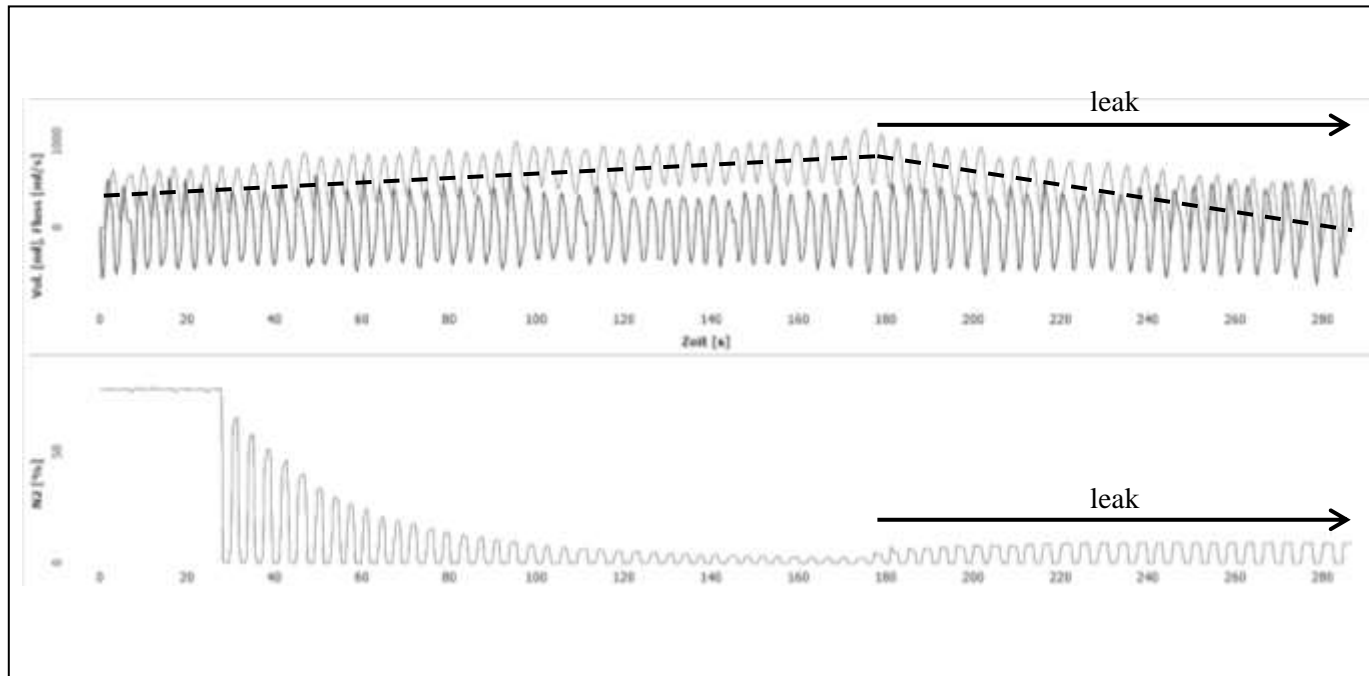

**Figure S3:** Sudden step change in volume trace and premature rise in N<sub>2</sub> signal due to continuous pre-capillary inspiratory and expiratory leak (trial did not reach washout criteria due to stabilization of elevated N<sub>2</sub> concentration).

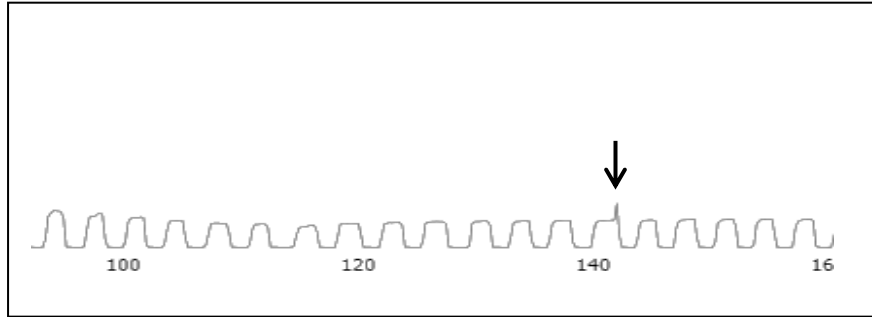

**Figure S4:** Sudden spike in  $N_2$  concentration during inspiration due to continuous pre-capillary inspiratory and expiratory leak (trial did not reach washout criteria due to stabilization of elevated  $N_2$  concentration).

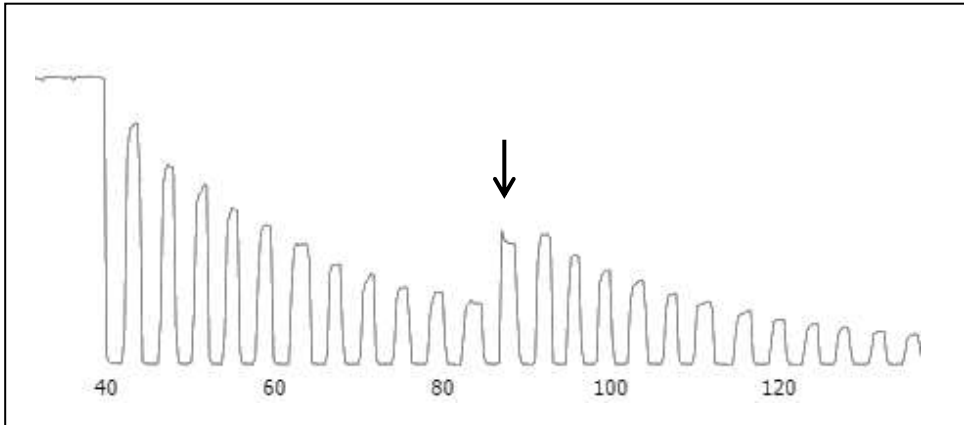

**Figure S5:** Step-up in end-tidal N<sub>2</sub> concentration due to isolated pre-capillary inspiratory and expiratory leak over two tidal breathes resulting in an increase in FRC and LCI.



**Figure S6: Practical example of leveling of end-tidal N<sub>2</sub>-concentration due to leak**

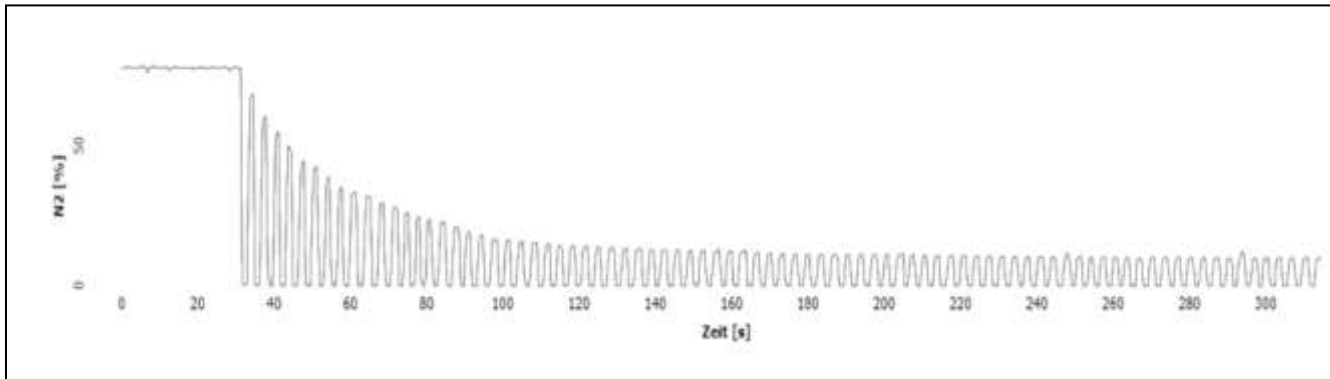

**Figure S6:** Stabilization of end-tidal N<sub>2</sub> concentration at 10% due to continuous pre-capillary inspiratory and expiratory leak. The washout could not be completed because the end-tidal N<sub>2</sub> concentration does not fall below 2.5%. In MBW measurements, it can be difficult to differentiate between elevated N<sub>2</sub> concentrations due to a continuous leak or increased ventilation inhomogeneity as a result of lung disease.
